# Supplementary material for: Interferon-γ augments GABA release in the developing neocortex via nitric oxide synthase/soluble guanylate cyclase and constrains network activity
Source: PubMed Central journal article supplement (PMC9401097; doi:10.3389/fncel.2022.913299), 2022-08-10
Supplement: Data_Sheet_1.pdf [file Data_Sheet_1.pdf]

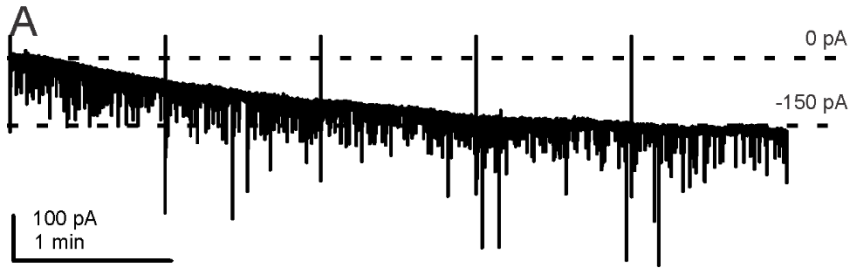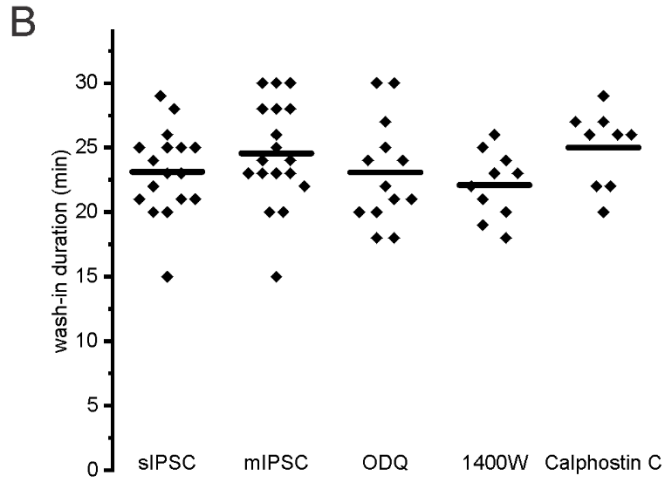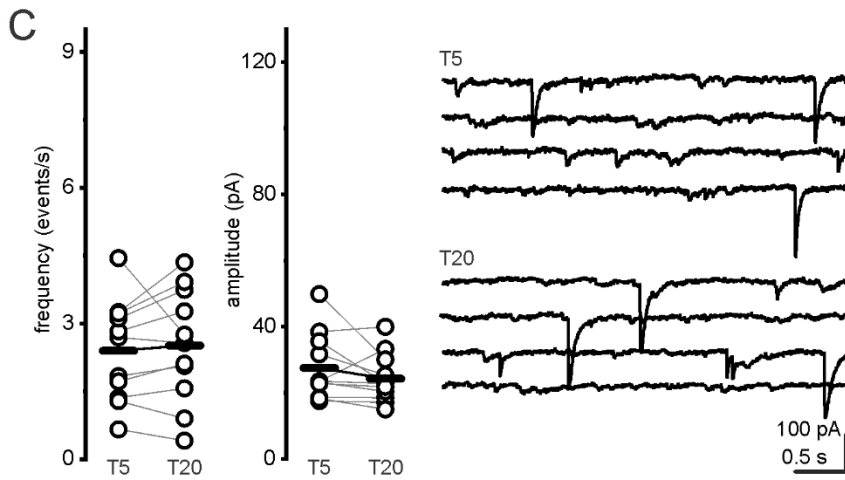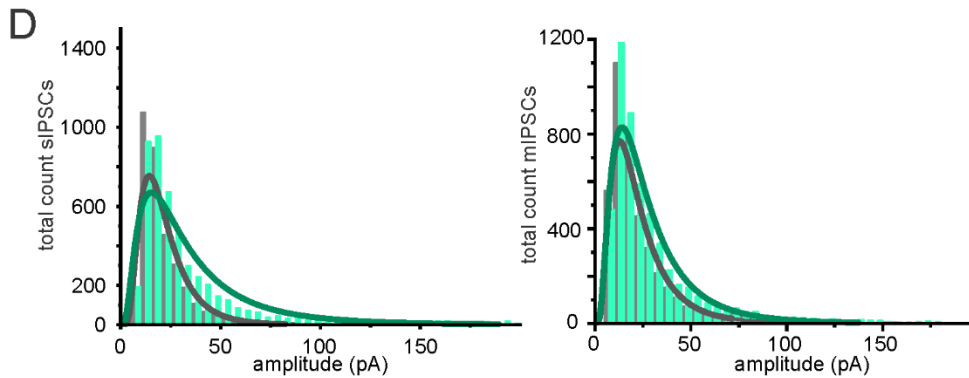

**Supplementary Figure 1**

**A** Exemplary recording showing typical current development (continuously clamped at  $-60$  mV) after establishing whole-cell configuration using a CsCl based pipette solution. Note the slow increase in holding current from close to  $0$  pA to approximately  $-150$  pA within five minutes, as intracellular solution exchanges with pipette solution. Artifacts that appear at the beginning of every minute are  $\pm 3$  mV test pulses that were used to monitor series resistance and capacitance.

**B** Overview over exposure times of IFN- $\gamma$  for respective series.

**C** Recordings without IFN- $\gamma$  show comparable sIPSC frequency and amplitude at minute 5 and minute 20. Note that the first 5 minutes were disregarded for all recordings to allow pipette solution and bath applied drugs to equilibrate. Series resistance and holding current remained comparable ( $R_{s1} = 11.7 \pm 1.1$  M $\Omega$  vs.  $R_{s2} = 12.1 \pm 1.2$  M $\Omega$ ,  $P = 0.31$ , paired t-test,  $n = 11$ ,  $N = 3$ ;  $I_{\text{hold}1} = -353.9 \pm 52.9$  pA vs.  $I_{\text{hold}2} = -271.9 \pm 43.44$  pA,  $P = 0.06$ , paired t-test,  $n = 11$ ,  $N = 3$ ). The non-significant trend towards decrease in holding current might be a time-dependent effect (unlikely related to IFN- $\gamma$  when occurring in other recordings).

**D** Amplitude histograms over all recorded events from Fig. 1C and Fig. 2E show no clear distinction between action potential evoked and spontaneous synaptic release by amplitudes before (grey/black) and under IFN- $\gamma$  (light green/green).

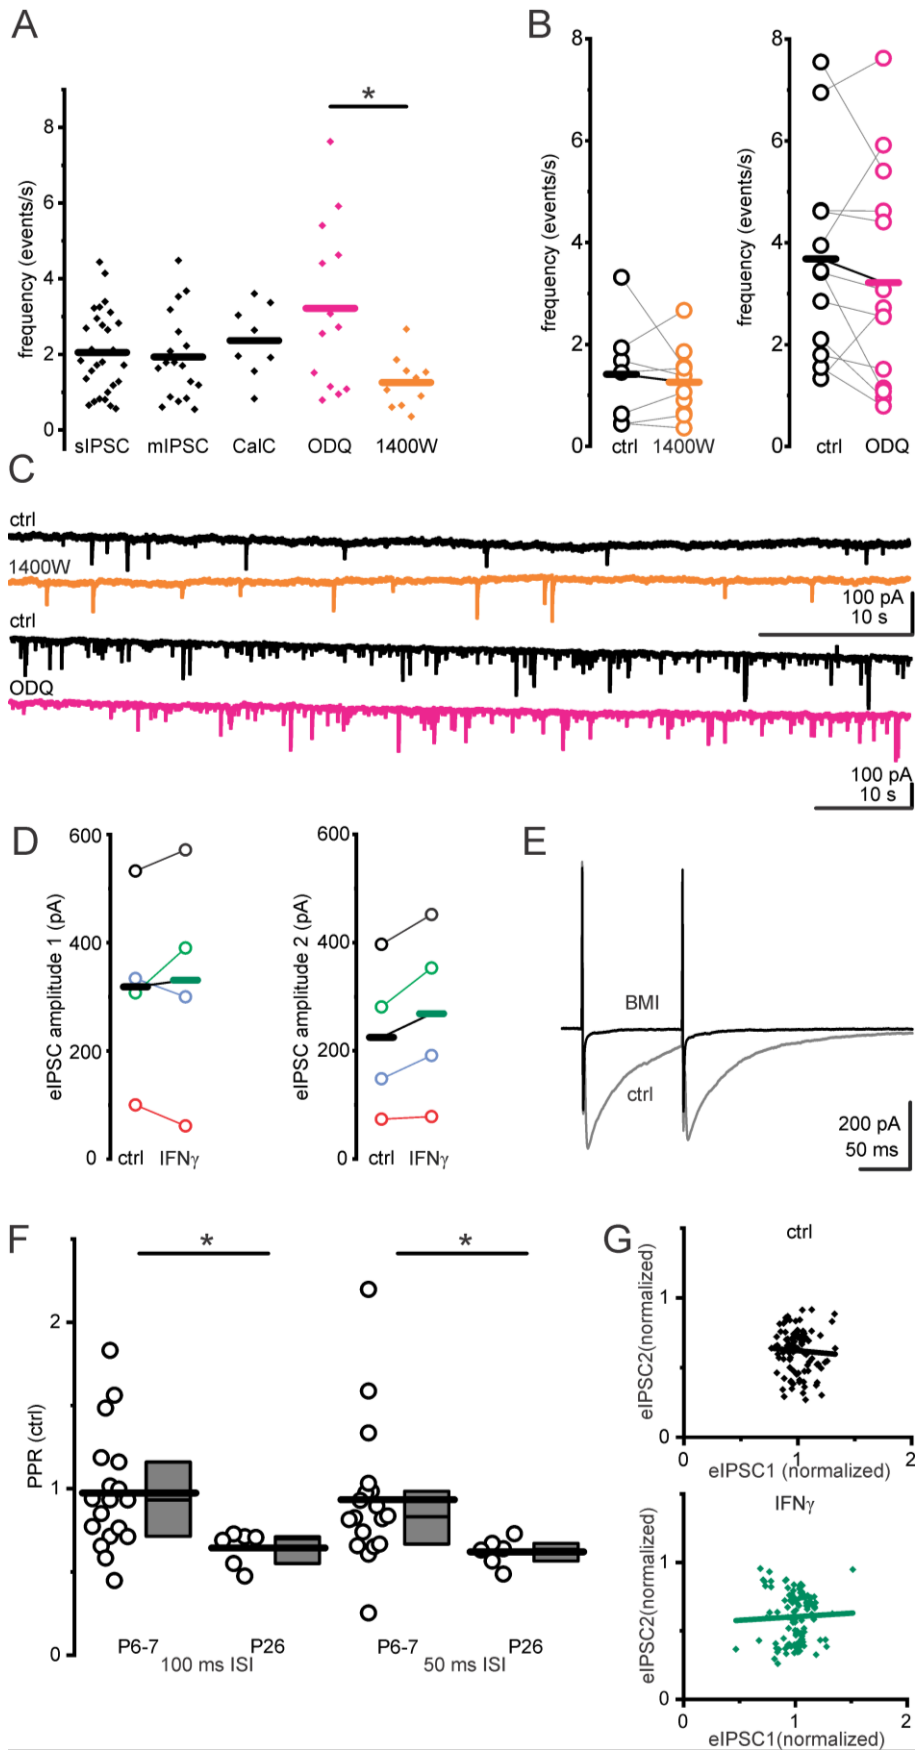

**Supplementary Figure 2**

**A** Initial IPSC frequencies before application of IFN- $\gamma$  show sizeable variance. ODQ (magenta) and 1400W (orange) means differ significantly ( $f_{1400W} = 1.26 \pm 0.22$  events  $s^{-1}$  vs.  $f_{ODQ} = 3.22 \pm 0.61$  events  $s^{-1}$ ,  $P = 0.007$ , Bonferroni corrected one-way ANOVA).

**B** Pairwise analysis reveals that differences between initial frequencies in 1400W (orange) and ODQ (magenta) series cannot be attributed to the inhibitors ( $f_{ctrl(1400W)} = 1.41 \pm 0.39$  events  $s^{-1}$  vs.  $f_{1400W} = 1.31 \pm 0.29$  events  $s^{-1}$ ,  $P = 0.7$ , paired t-test,  $n = 7$ ;  $f_{ctrl(ODQ)} = 3.68 \pm 0.58$  events  $s^{-1}$  vs.  $3.39 \pm 0.64$  events  $s^{-1}$ ,  $P = 0.4$ , paired t-test,  $n = 12$ ). Note that means and sample numbers differ slightly from those given in the manuscript. Some recordings were started with respective inhibitors in the perfusate from the beginning and could not be considered here.

**C** Example traces from both series before (black) and with respective inhibitors (1400W, orange and ODQ, magenta).

**D** First and second evoked IPSCs that meet our inclusion criteria for amplitude comparison ( $R_s$  change below 25 %) remain comparable before and under IFN- $\gamma$  ( $I_{1\ ctrl} = 318.4 \pm 88.4$  pA vs.  $I_{1\ IFN\gamma} = 330 \pm 106.1$  pA,  $P = 0.7$ , paired t-test,  $n = 4$  left;  $I_{2\ ctrl} = 224.9 \pm 71.6$  pA vs.  $I_{2\ IFN\gamma} = 268.6 \pm 83.1$  pA,  $P = 0.054$ , paired t-test,  $n = 4$  right). Colors of circles and lines label individual neurons.

**E** Paired pulse recordings demonstrate that evoked currents were completely blocked using GABA<sub>A</sub> antagonist 10 mM bicuculline methiodide (BMI). Control in gray, BMI in black. Twenty successive recordings were averaged for both conditions.

**F** Comparing inhibitory paired pulse ratios (PPR) under control conditions from P6 - 7 rats with respective PPR late juvenile rats (average age  $26.2 \pm 1.1$  days, referred to as P26 in figures) published in (Janach et al., 2022) recordings from P6 - 7 rats show significantly higher paired pulse ratios:  $PPR_{100msP6-7} = 1.0 \pm 0.1$  vs.  $PPR_{10HzP26} = 0.6 \pm 0.0$  ( $P = 0.002$ , unequal variances t-test,  $n = 18, 6$  respectively) and  $PPR_{50msP6-7} = 0.9 \pm 0.1$  vs.  $PPR_{20HzP26} = 0.6 \pm 0.0$  ( $P = 0.01$ , Mann-Whitney test,  $n = 18, 6$  respectively). Top, middle, and bottom lines of boxes represent percentiles 75, 50 and 25, respectively, long bars represent mean PPR.

**G** Published data from late juvenile (Janach et al., 2022) was used to test if amplitudes of the first and second eIPSC are correlated. Amplitudes were normalized and pooled. None of the individual experiments (both in control or IFN- $\gamma$  conditions) displays a correlation between the amplitude of the first eIPSC and the second eIPSC.

**Reference**

Janach, G. M. S., Böhm, M., Döhne, N., Kim, H.-R., Rosário, M., and Strauss, U. (2022). Interferon- $\gamma$  enhances neocortical synaptic inhibition by promoting membrane association and phosphorylation of GABA<sub>A</sub> receptors in a protein kinase C-dependent manner. *Brain. Behav. Immun.* 101, 153–164. doi:10.1016/j.bbi.2022.01.001.
